# Supplementary material
Source: PubMed Central journal article supplement (PMC5492937)
Supplement: NIHMS870133-supplement-Fig_S1.pdf [file NIHMS870133-supplement-Fig_S1.pdf]

# Supplementary data

Fig. S1 DTH FS Neo 2471bp synthetic construct

DTH EXON4 intron (258 bp homology) lox P Neo lox P intron DTH EXON5 (332 bp homology);  
A = +1 bp FS insertion; GT = -1 bp FS deletion site

TTGAGGAGGATGTTGAGTTTGAAGGAGCGTTGAACAGGAGCAGTCGGAGTCGCAGTCGCAGG  
AGCCAGAAGGCAACACAACAGCCGACCAAGAACGgtgagcagggggttctagaatccagcagccaacat  
aagtagtacttaacttctgagaggggctttgaaaagcgtgacattgatttaagtgtctaataatgataaagtccagggcagaggaa  
aagcactcagccacacggacaattgtgagtgggcgct

CCGATCATATTCAATAACCCCTTAATATAACTTCGTATAATGTATGCTATAACGAAGTTATTAGG  
TCTGAAGAGGAGTTTACGTCCAGCCAAGCTAGCTTGGCTGCAGGTCGTCGAAATTCTACC  
GGGTAGGGGAGGCGCTTTTCCCAAGGCAGTCTGGAGCATGCGCTTTAGCAGCCCCGCTG  
GGCACTTGGCGCTACACAAGTGGCCTCTGGCCTCGCACACATTCCACATCCACCGGTAGG  
CGCCAACCGGCTCCGTTCTTTGGTGGCCCCCTTCGCGCCACCTTCTACTCCTCCCCTAGTC  
AGGAAGTTCCCCCGCCCCGCAGCTCGCGTCGTGCAGGACGTGACAAATGGAAGTAGC  
ACGTCTCACTAGTCTCGTGACATGGACAGCACCCTGAGCAATGGAAGCGGGTAGGCT  
TTGGGGCAGCGCCAATAGCAGCTTTGCTCCTTCGCTTTCTGGGCTCAGAGGCTGGGAAG  
GGGTGGTCCGGGGGCGGGCTCAGGGGCGGGCTCAGGGGCGGGGCGGGCGCCCCGAAG  
GTCCTCCGGAGGCCCGGCATTCTGCACGCTTCAAAGCGCACGTCTGCCGCGCTGTTCTC  
CTCTTCTCATCTCCGGGCTTTTCGACCTGCAGCCTGTTGACAATTAATCATCGGCATAGT  
ATATCGGCATAGTATAATACGACAAGGTGAGGAACTAAACC**ATGGGATCGGCCATTGAAC  
AAGATGGATTGCACGCAGGTTCTCCGGCCGCTTGGGTGGAGAGGCTATTCGGCTATGAC  
TGGGCACAACAGACAATCGGCTGCTCTGATGCCGCCGTGTTCCGGCTGTCAGCGCAGGG  
GCGCCCGTTCCTTTGTCAAGACCGACCTGTCCGGTGCCCTGAATGAACTGCAGGACG  
AGGCAGCGCGGCTATCGTGGCTGGCCACGACGGGCGTTCTTGGCGAGCTGTGCTCGA  
CGTTGTCACTGAAGCGGGAAGGGACTGGCTGCTATTGGGCGAAGTGCCGGGGCAGGAT  
CTCCTGTATCTCACCTTGTCTCTGCCGAGAAAGTATCCATCATGGCTGATGCAATGCCG  
CGGCTGCATACGCTTGTCCGGCTACCTGCCATTTCGACCACCAAGCGAAACATCGCAT  
CGAGCGAGCACGTACTCGGATGGAAGCCGGTCTTGTTCGATCAGGATGATCTGGACGAA  
GAGCATCAGGGGCTCGCGCCAGCCGAAGTTCGCCAGGCTCAAGGCGCGCATGCCCG  
ACGGCGATGATCTCGTTCGTGACCCATGGCGATGCCTGCTTGCCGAATATCATGGTGGAA  
AATGGCCGCTTTTCTGGATTATCGACTGTGGCCGGCTGGGTGTGGCGGACCGCTATCA  
GGACATAGCGTTGGCTACCCGTGATATTGCTGAAGAGCTTGGCGGCGAATGGGCTGACC  
GCTTCTCGTGCTTTACGGTATCGCCGCTCCCATTTCGCAGCGCATCGCCTTCTATCGCC  
TTCTTGACGAGTTCTTCTGA**

AGGGGATCAATTCTTAGAGCTCGCTGATCAGCCTCGACTGT  
GCCTTCTAGTTGCCAGCCATCTGTTGTTTGCCCTCCCCCGTGCCTTCTTGACCCTGGAA  
GGTGCCACTCCCACTGTCTTTCCTAATAAAAATGAGGAAATTGCATCGCATTGTCTGAGTA  
GGTGTCACTTATTCTGGGGGGTGGGGTGGGGCAGGACAGCAAGGGGGAGGATTGGGAA  
GACAATAGCAGGCATGCTGGGGATGCGGTGGGCTCTATGGCTTCTGAGGCGGAAAGAAC  
CAGCTGGGGCTCGACTAGAGCTTGCAGCAACCCTTAATATAACTTCGTATAATGTATGCTAT  
ACGAAGTTATTAGGTCCCTCGAGGGGATCCACTAG

cgctcgtctctctctctctctctctctctctgtggaatgtcgacattccctttcatttgtacgctcgactaataacaagtacgaaatcgcttt  
gcctggcaaccgtctcactgccactgccacgtagctcgcttatcgtttacgtgaccctaagccttgaagattgcatccttaacctacaca  
ttatccccgcttttttggccctttgagATTACGGTCTCACCGAGGACGAGTTTTGTTGGCCAAATGCCGC
