# Supplementary material
Source: PubMed Central journal article supplement (PMC5492937)
Supplement: NIHMS870133-supplement-Fig_S2.pdf [file NIHMS870133-supplement-Fig_S2.pdf]

**Fig S2. Identification of the *ple*<sup>2</sup> Δ2271A mutation in DTH exon 5**

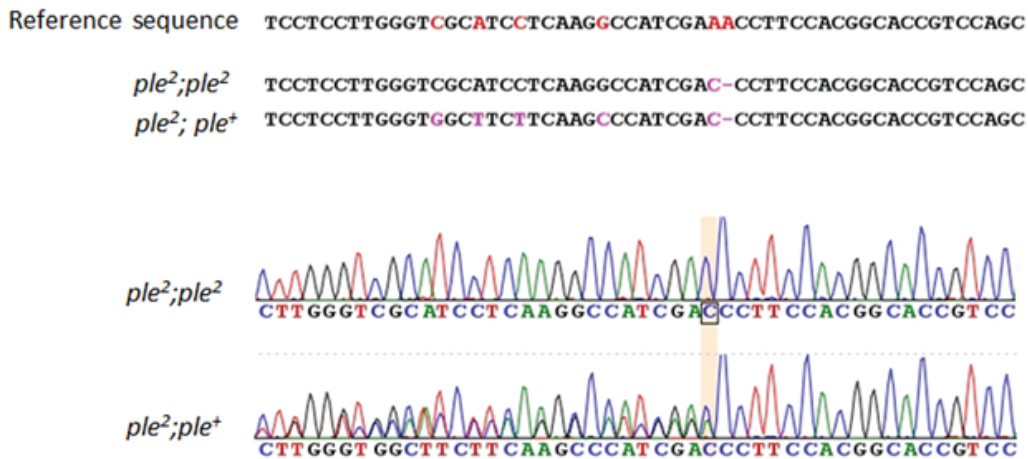

**Table S1. Enumeration of TH IR and DA IR cell bodies.**

The data in this table indicates that number of PAL neurons showing DA IR is similar to those labeled with TH IR. PPL1/2, PPM1/3 and PPM3 DA IR cell counts are somewhat reduced relative to TH IR, and PAM cell bodies are not clearly distinguished with DA IR. L, left brain hemisphere; R, right brain hemisphere; b, individual brains.

| TH IR        | PAM L          | PAM R | PAL L | PAL R | PPL1/2 L | PPL1/2 R | PPM1/2 L | PPM1/2 R | PPM3 L              | PPM3 R |
|--------------|----------------|-------|-------|-------|----------|----------|----------|----------|---------------------|--------|
| W1118 b1     | ~100           | ~100  | 4     | 5     | 15       | 16       | 11       | 7        | 10                  | 6      |
| WT Rescue b1 | ~100           | ~100  | 5     | 5     | 16       | 16       | 11       | 12       | 8                   | 8      |
| WT Rescue b2 | ~100           | ~100  | 5     | 5     | 15       | 15       | 7        | 10       | 10                  | 9      |
| WT Rescue b3 | Poorly visible |       | 5     | 5     | 15       | 10       | 10       | 11       | 10                  | 11     |
| WT Rescue b4 | ~100           | ~100  | 5     | 5     | 12       | 12       | 10       | 8        | Obscured by trachea |        |
| DA IR        |                |       |       |       |          |          |          |          |                     |        |
| W1118 b1     | Poorly visible |       | 5     | 5     | 10       | 10       | 7        | 9        | 6                   | 6      |
| W1118 b2     | Poorly visible |       | 5     | 5     | 8        | 7        | 10       | 6        | 5                   | 6      |
| W1118 b3     | Poorly visible |       | 4     | 2     | 11       | 11       | 7        | 7        | 6                   | 3      |
| Wt Rescue b1 | Poorly visible |       | 5     | 5     | 9        | 10       | 7        | 7        | 5                   | 3      |
| Wt Rescue b2 | Poorly visible |       | 5     | 5     | 10       | 10       | 7        | 7        | 5                   | 3      |
