# Supplementary material
Source: PubMed Central journal article supplement (PMC5492937)

**Fig S3. L-DOPA/carbidopa feeding has no effect on TH IR.**

DTH activity is regulated by phosphorylation that is relieved at high DA concentration (Vié et al. 1999). Increasing brain DA by L-DOPA/Carbidopa feeding did not increase low immunoreactivity of DTH expressed from UAS-DTH1m indicating that protein phosphorylation does not block DTH epitopes recognized by the antibody. Maximum intensity Z-projections of the posterior DA-neurons

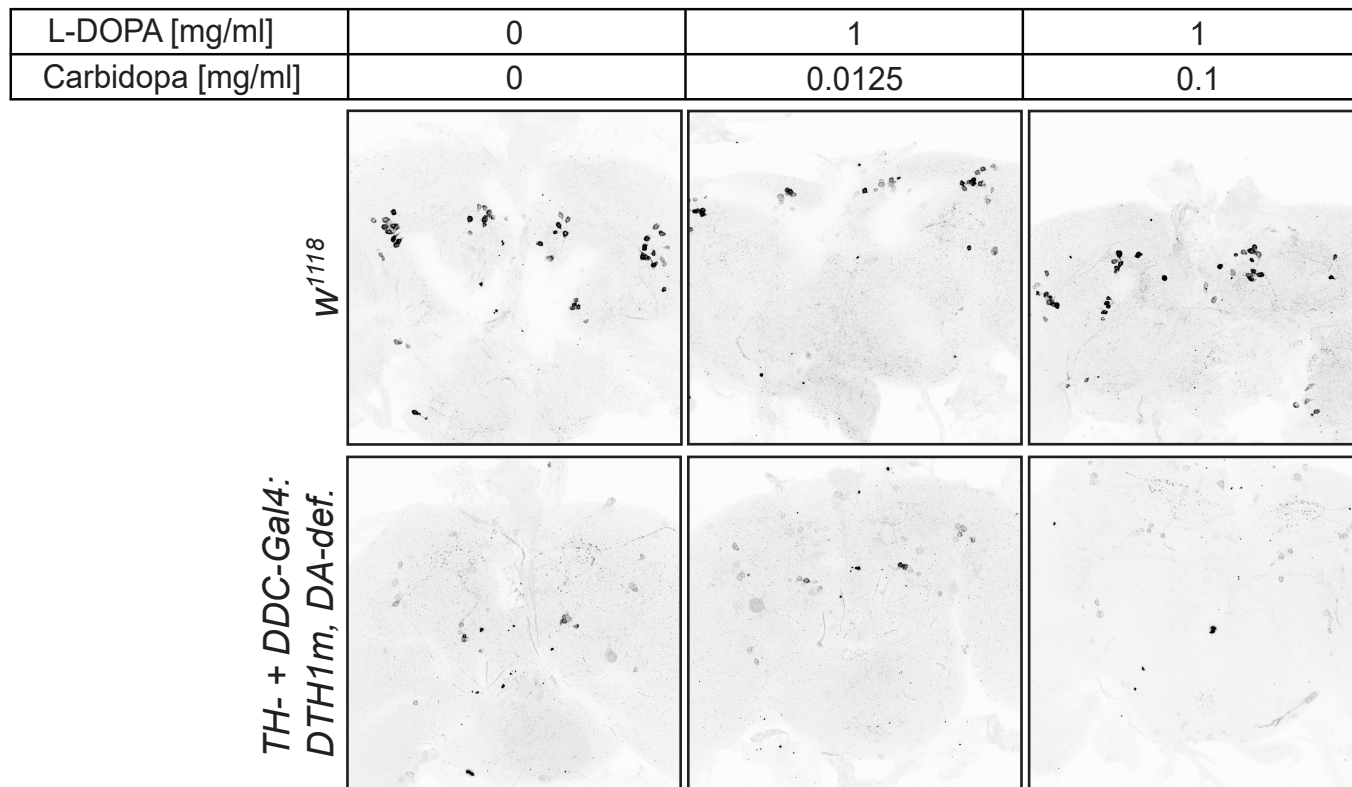

Supplement: NIHMS870133-supplement-Fig_S3.pdf [file NIHMS870133-supplement-Fig_S3.pdf]
