# Supplementary material
Source: PubMed Central journal article supplement (PMC5492937)

**Fig S4. Rescue of brain DTH1m RNA levels in DA deficient flies rescued by TH-GAL4 and/or DDC-Gal4:UAS-DTH1m.** The neural DTH1 mRNA isoform is efficiently transcribed from the UAS-DTH1m, proportionally to the number of neurons covered by Gal4 drivers, reaching wild type mRNA level with TH- + DDC-Gal4:UAS-DTH1m.  $\Delta\Delta\text{Ct}$  quantitation relative to endogenous  $\text{Ef1}\beta$  control [ $*P < 1\text{E-}2$ ,  $***P < 1\text{E-}4$ , one-way ANOVA, error bars represent SEM].

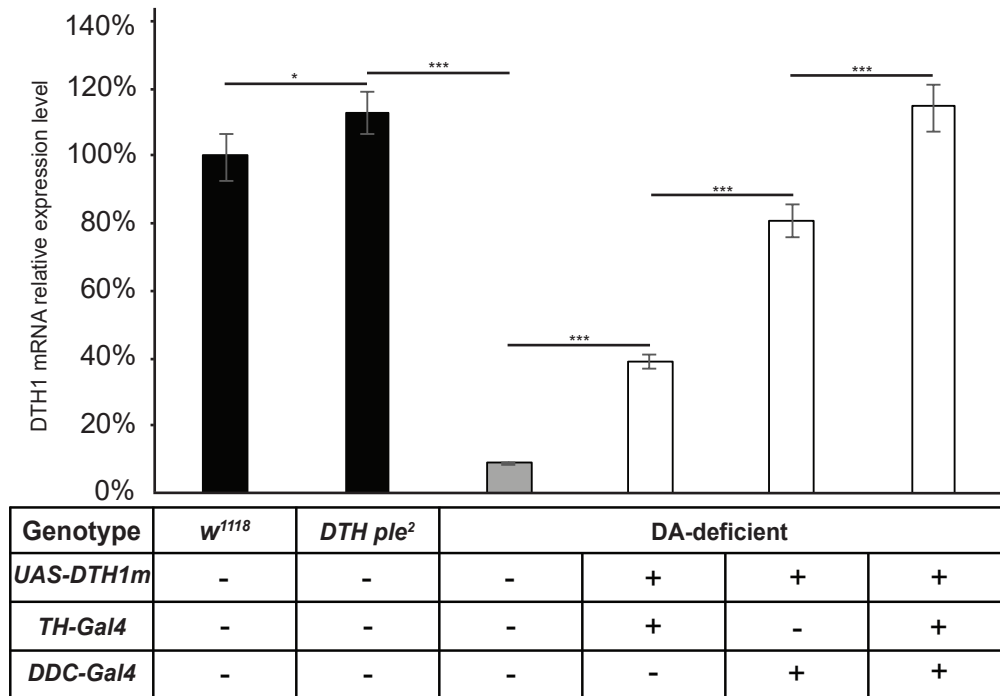

Supplement: NIHMS870133-supplement-Fig_S4.pdf [file NIHMS870133-supplement-Fig_S4.pdf]
